# Supplementary material for: Impact of Methylprednisolone on Short- and Long-Term Outcomes in Critically Ill Patients with Sepsis: A Cohort Study Using the MIMIC-IV Database
Source: Research Square preprint supplement (doi:10.21203/rs.3.rs-8297386/v1), 2026-01-22
Supplement: Supplementary file 1 [file 926aafa322a35525ec827af5.docx]

Impact of Methylprednisolone on Short- and Long-Term Outcomes in Critically Ill Patients with Sepsis: A Cohort Study Using the MIMIC-IV Database

**Zhenhua Huang1**†**,** **Jiagui Zhao2**†**, Qinghua Yuan3**†**, Xiaoan Yang4*****, Xin Li5***

1 Department of Emergency Medicine, the First Affiliated Hospital of Shenzhen University &Shenzhen Second People’s Hospital, Shenzhen, 518035, China.

2 Department of Critical Care Medicine, Zhongda Hospital, School of Medicine, Southeast University, Jiangsu, 210009, China

3 Department of Cardiology, the Seventh Affiliated Hospital of Sun Yat-sen University, Shenzhen, 518000, China.

4 Department of Infectious Diseases, the 3rd Affiliated Hospital, Sun Yat‑Sen University, No 600, Tianhe road, Tianhe district, Guangzhou, 510630, China.

5 Department of Emergency Medicine, Guangdong Provincial People' s Hospital (Guangdong Academy of Medical Sciences), Southern Medical University, Guangzhou, 518001, China

†**Zhenhua Huang, Jiagui Zhao and Qinghua Yuan** contributed equally to this work and share first authorship.

*Corresponding authors:

**Xiaoan Yang**

Department of Infectious Diseases, the 3rd Affiliated Hospital, Sun Yat‑Sen University, No 600, Tianhe road, Tianhe district, Guangzhou, 510630, China. Email: [*yxan@mail2.sysu.edu.cn*](mailto:yxan@mail2.sysu.edu.cn)

**Xin Li**

Department of Emergency Medicine, Guangdong Provincial People' s Hospital (Guangdong Academy of Medical Sciences), Southern Medical University, Guangzhou, 518001, China Email:  [*sylixin@scut.edu.cn*](mailto:yuanqinghua@sysush.com)

**Running title: Methylprednisolone and Sepsis Outcomes**

**Table S1. Variance Inflation Factor (****VIF) Analysis for Multicollinearity Assessment**

| Variable | VIF Value |
| --- | --- |
| Gender, n (%) | 1.1 |
| Age (years) | 2.0 |
| Race, n (%) | 1.1 |
| LOS-ICU (day) | 1.2 |
| Renal disease, n (%) | 1.6 |
| CHF, n (%) | 1.4 |
| PVD, n (%) | 1.1 |
| CVD, n (%) | 1.1 |
| CPD, n (%) | 1.3 |
| SPO2, (%) | 1.2 |
| HR, (bpm) | 1.5 |
| SBP, (mmHg) | 1.5 |
| DBP, (mmHg) | 1.7 |
| RR, (bpm) | 1.3 |
| T, (℃) | 1.3 |
| Serum calcium, (mmol/L） | 1.0 |
| BUN, (IQR), (mmol/L) | 1.6 |
| Scr, (mg/dL) | 1.8 |
| ALT, (U/L) | 1.5 |
| AST, (U/L) | 1.6 |
| SOFA score | 2.9 |
| SAPSII score | 4.0 |
| APSIII score | 3.9 |
| PLT, (109/L) | 1.2 |
| RBC, (1012/L) | 1.2 |
| WBC, (109/L) | 1.1 |
| Used aspirin, n (%) | 1.4 |
| Used furosemide, n (%) | 1.3 |
| Used metoprolol, n (%) | 1.3 |
| Used insulin, n (%) | 1.5 |
| Used statin, n (%) | 1.3 |
| Used heparin, n (%) | 1 |
| Used MP | 1.1 |
| Cardiac surgery, n (%) | 1.2 |
| Diabetes, n (%) | 1.5 |
| Hypertension, n (%) | 1.1 |
| MI, n (%) | 1.2 |
| stroke, n (%) | 1 |
| Asthma, n (%) | 1.3 |

**Note**: Variance inflation factor (VIF) was calculated as VIF = 1/(1-R²), where R² was obtained from the regression of each variable on all other variables. Variables are arranged in descending order of VIF values. A VIF ≥ 5 was considered to indicate significant multicollinearity. In this initial assessment, all variables showed VIF values < 5, suggesting no significant multicollinearity among the variables.

**Table S2. Baseline Characteristics of the Study Population Before and After Multiple Imputation.**

| Characteristics | Before MI (N=9876) | After MI (N=9876) | P-value |
| --- | --- | --- | --- |
| Age (years) | 67.47 ± 16.01 | 67.47 ± 16.01 | 1.000 |
| LOS-ICU, (IQR), (day) | 3.67 (1.97-8.08) | 3.67 (1.97-8.08) | 0.962 |
| HR, (bpm) | 91.47 ± 17.40 | 91.47 ± 17.40 | 0.990 |
| SBP, (mmHg) | 111.07 ± 13.92 | 111.08 ± 13.92 | 0.953 |
| DBP, (mmHg) | 60.69 ± 9.83 | 60.70 ± 9.83 | 0.948 |
| RR, (bpm) | 21.23 ± 4.43 | 21.22 ± 4.43 | 0.976 |
| SPO2, (%) | 96.50 ± 2.39 | 96.51 ± 2.39 | 0.834 |
| T, (℃) | 36.95 ± 0.62 | 36.95 ± 0.62 | 0.970 |
| PLT, (IQR), (109/L) | 183.50 (119.00-267.33) | 184.00 (119.33-268.50) | 0.738 |
| RBC, (1012/L) | 3.37 ± 0.69 | 3.36 ± 0.69 | 0.606 |
| WBC, (IQR), (109/L) | 13.33 (8.98-18.80) | 13.33 (8.97-18.83) | 0.934 |
| BUN, (IQR), (mmol/L) | 24.50 (14.00-43.00) | 25.00 (14.00-43.00) | 0.769 |
| Scr, (IQR), (mg/dL) | 1.40 (0.85-2.25) | 1.40 (0.85-2.25) | 0.920 |
| AST, (IQR), (U/L) | 39.00 (21.50-85.00) | 38.00 (17.00-99.50) | 0.261 |
| ALT, (IQR), (U/L) | 26.00 (14.00-57.00) | 26.00 (12.00-72.50) | 0.31 |
| Serum calcium, (mmol/L） | 26.00 (12.00-72.50) | 8.02 ± 1.14 | 1.000 |
| SOFA score, (IQR) | 7.00 (4.00-10.00) | 7.00 (4.00-10.00) | 1.000 |
| SAPSII score, (IQR) | 43.00 (34.00-54.00) | 43.00 (34.00-54.00) | 1.000 |
| APSIII score, (IQR) | 55.00 (43.00-72.00) | 55.00 (43.00-72.00) | 1.000 |
| Gender, n (%) |  |  | 1.000 |
| Man | 5481 (55.50%) | 5481 (55.50%) | 1.000 |
| Female | 4395 (44.50%) | 4395 (44.50%) | 1.000 |
| Race, n (%) |  |  | 1.000 |
| Whight | 6825 (69.11%) | 6825 (69.11%) | 1.000 |
| Black | 1041 (10.54%) | 1041 (10.54%) | 1.000 |
| Yellow | 395 (4.00%) | 395 (4.00%) | 1.000 |
| Unknown | 1615 (16.35%) | 1615 (16.35%) | 1.000 |
| Comorbidities, n (%) |  |  |  |
| Renal disease, n (%) | 2686 (27.20%) | 2686 (27.20%) | 1.000 |
| CHF, n (%) | 3384 (34.26%) | 3384 (34.26%) | 1.000 |
| PVD, n (%) | 1084 (10.98%) | 1084 (10.98%) | 1.000 |
| CVD, n (%) | 1242 (12.58%) | 1242 (12.58%) | 1.000 |
| CPD, n (%) | 2651 (26.84%) | 2651 (26.84%) | 1.000 |
| History, n (%) |  |  |  |
| Cardiac surgery, n (%) | 2018 (20.43%) | 2018 (20.43%) | 1.000 |
| Diabetes, n (%) | 3736 (37.83%) | 3736 (37.83%) | 1.000 |
| Hypertension, n (%) | 5613 (56.83%) | 5613 (56.83%) | 1.000 |
| MI, n (%) | 1830 (18.53%) | 1830 (18.53%) | 1.000 |
| Stroke, n (%) | 47 (0.48%) | 47 (0.48%) | 1.000 |
| Asthma, n (%) | 1113 (11.27%) | 1113 (11.27%) | 1.000 |
| Used medicine |  |  |  |
| Aspirin, n (%) | 3859 (39.17%) | 3871 (39.20%) | 0.970 |
| Furosemide, n (%) | 6069 (61.60%) | 6080 (61.56%) | 0.956 |
| Metoprolol, n (%) | 4491 (45.58%) | 4503 (45.60%) | 0.988 |
| Insulin, n (%) | 6188 (62.81%) | 6203 (62.81%) | 0.999 |
| Statin, n (%) | 4639 (47.09%) | 4652 (47.10%) | 0.981 |
| Heparin, n (%) | 9377 (95.18%) | 9399 (95.17%) | 0.978 |
| MP, n (%) | 1000 (10.13%) | 1000 (10.13%) | 1.000 |

Continuous variables are summarized as mean (SD) or median (trisection interval); categorical variables are presented as percentages (%).LOS, length of stay; HR, heart rate; SBP, systolic blood pressure; DBP, diastolic blood pressure; RR, respiratory Rate; SPO2, peripheral oxygen saturation; T, temperature; SOFA, sequential organ failure assessment; SAPS II score, simplified acute physiology score II; APS III, acute physiology score III; PTL, platelet count; RBC, red blood cell count; WBC, white blood cell count; AST, aspartate aminotransferase; ALT, alanine aminotransferase; BUN, blood urea nitrogen; Scr, serum creatinine, CHF, chronic heart failure; PVD, peripheral vascular disease; CVD, cardiovascular disease; CPD, chronic pulmonary disease; MI, myocardial infarction; ICU, intensive care unit; MP, methylprednisolone.

**TABLE S3 Factors influencing risk of mortality analyzed by univariate Cox proportional hazards regression analysis**

| Variable | Statistics | 30-day mortality | 365-day mortality |
| --- | --- | --- | --- |
| HR (95 CI) P-value | HR (95 CI) P-value |
| Age (years) | 67.47 ± 16.01 | 1.02 (1.02, 1.02) <0.0001 | 1.02 (1.02, 1.02) <0.0001 |
| LOS-ICU, (IQR), (day) | 3.67 (1.97-8.08) | 0.99 (0.98, 0.99) <0.0001 | 1.00 (1.00, 1.00) 0.1978 |
| HR, (bpm) | 91.47 ± 17.40 | 1.01 (1.01, 1.01) <0.0001 | 1.00 (1.00, 1.00) 0.0004 |
| SBP, (mmHg) | 111.08 ± 13.92 | 0.98 (0.98, 0.99) <0.0001 | 0.99 (0.99, 0.99) <0.0001 |
| DBP, (mmHg) | 60.70 ± 9.83 | 0.98 (0.98, 0.98) <0.0001 | 0.98 (0.98, 0.98) <0.0001 |
| RR, (bpm) | 21.22 ± 4.43 | 1.04 (1.03, 1.05) <0.0001 | 1.02 (1.01, 1.02) <0.0001 |
| SPO2, (%) | 36.95 ± 0.62 | 0.61 (0.58, 0.64) <0.0001 | 0.95 (0.94, 0.96) <0.0001 |
| T, (℃) | 96.51 ± 2.39 | 0.92 (0.91, 0.93) <0.0001 | 0.61 (0.58, 0.63) <0.0001 |
| PLT, (IQR), (109/L) | 184.00 (119.33-268.50) | 1.00 (1.00, 1.00) <0.0001 | 1.00 (1.00, 1.00) <0.0001 |
| RBC, (1012/L) | 3.36 ± 0.69 | 0.81 (0.77, 0.86) <0.0001 | 0.74 (0.71, 0.77) <0.0001 |
| WBC, (IQR), (109/L) | 13.33 (8.97-18.83) | 1.01 (1.00, 1.01) <0.0001 | 1.00 (1.00, 1.01) 0.0066 |
| BUN, (IQR), (mmol/L) | 25.00 (14.00-43.00) | 1.01 (1.01, 1.01) <0.0001 | 1.01 (1.01, 1.01) <0.0001 |
| Scr, (IQR), (mg/dL) | 1.40 (0.85-2.25) | 1.10 (1.09, 1.12) <0.0001 | 1.09 (1.08, 1.10) <0.0001 |
| AST, (IQR), (U/L) | 38.00 (17.00-99.50) | 1.00 (1.00, 1.00) <0.0001 | 1.00 (1.00, 1.00) <0.0001 |
| ALT, (IQR), (U/L) | 26.00 (12.00-72.50) | 1.00 (1.00, 1.00) <0.0001 | 1.00 (1.00, 1.00) <0.0001 |
| Serum calcium, (mmol/L） | 8.02 ± 1.14 | 1.07 (1.04, 1.11) <0.0001 | 1.09 (1.06, 1.12) <0.0001 |
| SOFA score, (IQR) | 7.00 (4.00-10.00) | 1.15 (1.14, 1.16) <0.0001 | 1.11 (1.11, 1.12) <0.0001 |
| SAPSII score, (IQR) | 43.00 (34.00-54.00) | 1.04 (1.04, 1.04) <0.0001 | 1.04 (1.04, 1.04) <0.0001 |
| APSIII score, (IQR) | 55.00 (43.00-72.00) | 1.03 (1.02, 1.03) <0.0001 | 1.02 (1.02, 1.02) <0.0001 |
| **Gender, n (%)** |  |  |  |
| Man | 5481 (55.50) | 1.0 | 1.0 |
| Female | 4395 (44.50) | 1.02 (0.95, 1.09) 0.6414 | 0.98 (0.93, 1.04) 0.5368 |
| **Race, n (%)** |  |  |  |
| Whight | 6825 (69.11) | 1.0 | 1.0 |
| Black | 1041 (10.54) | 0.89 (0.79, 1.01) 0.0716 | 0.93 (0.84, 1.02) 0.1237 |
| Yellow | 395 (4.00) | 1.04 (0.87, 1.25) 0.6608 | 1.02 (0.89, 1.18) 0.7423 |
| Unknown | 1615 (16.35) | 1.43 (1.31, 1.57) <0.0001 | 1.22 (1.14, 1.32) <0.0001 |
| **Comorbidities, n (%)** |  |  |  |
| Renal disease, n (%) | 2686 (27.20) | 1.31 (1.21, 1.41) <0.0001 | 1.41 (1.32, 1.49) <0.0001 |
| CHF, n (%) | 3384 (34.26) | 1.33 (1.23, 1.42) <0.0001 | 1.40 (1.32, 1.48) <0.0001 |
| PVD, n (%) | 1084 (10.98) | 1.36 (1.23, 1.51) <0.0001 | 1.35 (1.25, 1.47) <0.0001 |
| CVD, n (%) | 1242 (12.58) | 1.22 (1.10, 1.34) 0.0001 | 1.33 (1.23, 1.44) <0.0001 |
| CPD, n (%) | 2651 (26.84) | 1.13 (1.05, 1.22) 0.0020 | 1.13 (1.06, 1.20) <0.0001 |
| **History diseases, n (%)** |  |  |  |
| Cardiac surgery, n (%) | 2018 (20.43) | 1.04 (0.95, 1.13) 0.3964 | 1.10 (1.03, 1.18) 0.0047 |
| Diabetes, n (%) | 3736 (37.83) | 1.00 (0.92, 1.07) 0.8955 | 1.08 (1.02, 1.15) 0.0067 |
| Hypertension, n (%) | 5613 (56.83) | 1.07 (1.00, 1.15) 0.0575 | 1.09 (1.03, 1.15) 0.0041 |
| MI, n (%) | 1830 (18.53) | 1.41 (1.29, 1.53) <0.0001 | 1.42 (1.33, 1.52) <0.0001 |
| Stroke, n (%) | 47 (0.48) | 1.18 (0.72, 1.93) 0.5075 | 0.92 (0.60, 1.42) 0.7100 |
| Asthma, n (%) | 1113 (11.27) | 0.86 (0.77, 0.97) 0.0132 | 0.86 (0.78, 0.94) 0.0011 |
| **Used medicine** |  |  |  |
| Aspirin, n (%) | 3871 (39.20) | 0.78 (0.72, 0.84) <0.0001 | 0.93 (0.88, 0.99) 0.0191 |
| Furosemide, n (%) | 6080 (61.56) | 0.91 (0.84, 0.98) 0.0096 | 1.07 (1.01, 1.13) 0.0255 |
| Metoprolol, n (%) | 4503 (45.60) | 0.70 (0.65, 0.76) <0.0001 | 0.91 (0.86, 0.96) 0.0005 |
| Insulin, n (%) | 6203 (62.81) | 1.05 (0.98, 1.13) 0.1907 | 1.16 (1.09, 1.23) <0.0001 |
| Statin, n (%) | 4652 (47.10) | 0.42 (0.37, 0.48) <0.0001 | 0.89 (0.84, 0.94) <0.0001 |
| Heparin, n (%) | 9399 (95.17) | 0.71 (0.66, 0.76) <0.0001 | 0.57 (0.50, 0.64) <0.0001 |
| MP, n (%) | 1000 (10.13) | 1.16 (1.04, 1.30) 0.0074 | 1.23 (1.13, 1.34) <0.0001 |

**TABLE S4.** **Association between MP use and mortality in patients with sepsis before multiple imputation.**

| Group | Exposure | Number | Event (%) | Model I (HR,95%CI) P | Model II (HR,95%CI) P | Model III (HR,95%CI) P |
| --- | --- | --- | --- | --- | --- | --- |
|  | Used MP |  |  |  |  |  |
| 30-day mortality | No | 8876 | 2697 (30.39) | 1(Ref) | 1(Ref) | 1(Ref) |
|  | Yes | 1000 | 353 (35.30) | 1.16 (1.04, 1.30) 0.0074 | 1.24 (1.11, 1.39) 0.0001 | 1.16 (1.02, 1.31) 0.0207 |
|  | P for trend |  |  | <0.0001 | <0.0001 | <0.0001 |
|  | Used MP |  |  |  |  |  |
| 365-day mortality | No | 8876 | 4381 (49.36) | 1(Ref) | 1(Ref) | 1(Ref) |
|  | Yes | 1000 | 574 (57.40) | 1.23 (1.13, 1.34) <0.0001 | 1.33 (1.22, 1.45) <0.0001 | 1.19 (1.08, 1.31) 0.0006 |
|  | P for trend |  |  | <0.0001 | <0.0001 | <0.0001 |

Model I: we did not account for additional variables.

Model II: we adjusted gender, age and race.

Model III: we adjusted gender, age, race, renal disease; CHF; PVD; CVD; CPV; Asthma; MI; AST; ALT; serum calcium; Scr; BUN; PLT; RBC; WBC; SOFA; SAPS II; APS III; used aspirin; used furosemide; used metoprolol; used statin; used heparin. HR, Hazard Ratios; CI, confidence; Ref, reference.

**Table S5. Association between MP use and mortality in patients with sepsis: sensitivity analysis.**

| Group | Exposure | Number | Event (%) | Model I (HR,95%CI) P | Model II (HR,95%CI) P |
| --- | --- | --- | --- | --- | --- |
|  | Used MP |  |  |  |  |
| 30-day mortality | No | 8876 | 2697 (30.39) | 1(Ref) | 1(Ref) |
|  | Yes | 1000 | 353 (35.30) | 1.23 (1.10, 1.38) 0.0004 | 1.24 (1.11, 1.39) 0.0002 |
|  | P for trend |  |  | <0.0001 | <0.0001 |
|  | Used MP |  |  |  |  |
| 365-day mortality | No | 8876 | 4381 (49.36) | 1(Ref) | 1(Ref) |
|  | Yes | 1000 | 574 (57.40) | 1.26 (1.15, 1.38) <0.0001 | 1.28 (1.17, 1.40) <0.0001 |
|  | P for trend |  |  | <0.0001 | <0.0001 |

Model I: AST and ALT were excluded. We adjusted for gender, age, race, renal disease, CHF, PVD, CVD, CPD, asthma, prior MI, serum calcium, Scr, BUN, PLT, RBC, WBC, SOFA score, SAPS II score, APS III score, and use of aspirin, furosemide, metoprolol, statins and heparin.

Model II: In addition to AST and ALT, SAPS II was also excluded. Covariates adjusted for were identical to Model I except for the omission of SAPS II. Abbreviations: HR, hazard ratio; CI, confidence interval; Ref, reference category.
